# Contents

|                                                                                    |     |
|------------------------------------------------------------------------------------|-----|
| European Society of Human Reproduction and Embryology (ESHRE) Committees . . . . . | iii |
|------------------------------------------------------------------------------------|-----|

## Oral Presentations

### Monday, 2 July 2007

|             |                                                                               |     |
|-------------|-------------------------------------------------------------------------------|-----|
| O-001-O-002 | Session 01 – Keynote lectures . . . . .                                       | i1  |
| O-003-O-008 | Session 02 – Single embryo transfer . . . . .                                 | i1  |
| O-009-O-014 | Session 03 – Ovarian stimulation 1 . . . . .                                  | i4  |
| O-015-O-020 | Session 04 – ART - Outcome 1 . . . . .                                        | i6  |
| O-021-O-026 | Session 05 – Embryology . . . . .                                             | i9  |
| O-027-O-032 | Session 06 – Early pregnancy 1 . . . . .                                      | i11 |
| O-033-O-038 | Session 07 – Endocrinology - Basic . . . . .                                  | i14 |
| O-039-O-041 | Session 08 – Members’ information session . . . . .                           | i16 |
| O-042       | Session 09 – FSA / ESHRE Exchange session . . . . .                           | i16 |
|             | Session 10 – Poster discussions 1 . . . . .                                   | i17 |
| O-043-O-044 | Session 11 – Paramedical invited lectures - Nursing . . . . .                 | i18 |
| O-046-O-047 | Session 12 – Early pregnancy . . . . .                                        | i19 |
| O-048-O-051 | Session 13 – Paramedical - Laboratory . . . . .                               | i19 |
| O-052-O-056 | Session 14 – ART - Outcome 2 . . . . .                                        | i21 |
| O-057-O-061 | Session 15 – Female fertility - Clinical aspects . . . . .                    | i23 |
| O-062-O-066 | Session 16 – ICSI / TESE . . . . .                                            | i25 |
| O-067-O-071 | Session 17 – Prognostics factors . . . . .                                    | i27 |
| O-072-O-076 | Session 18 – Epidemiology . . . . .                                           | i29 |
| O-077-O-081 | Session 19 – PGS / Embryo selection . . . . .                                 | i31 |
| O-082-O-083 | Session 20 – New gatekeepers of reproduction: GPR 54 and kisspeptin . . . . . | i33 |
| O-084-O-085 | Session 21 – Health economics and reproductive medicine . . . . .             | i34 |
| O-086-O-089 | Session 22 – Ethics and law 1 . . . . .                                       | i34 |

### Tuesday, 3 July 2007

|             |                                                                                                                         |     |
|-------------|-------------------------------------------------------------------------------------------------------------------------|-----|
| O-090-O-091 | Session 23 – Are there new paradigms in ovarian germ cell biology? . . . . .                                            | i36 |
| O-092-O-093 | Session 24 – Adhesion prevention in infertility surgery . . . . .                                                       | i37 |
| O-094-O-095 | Session 25 – SREI/ASRM exchange lectures-Insulin sensitization in anovulatory<br>PCOS: Mechanisms and results . . . . . | i38 |
| O-096-O-097 | Session 26 – Paramedical invited lectures - laboratory standardization . . . . .                                        | i38 |
| O-098-O-103 | Session 27 – Ovarian stimulation 2 . . . . .                                                                            | i39 |
|             | Session 28 – Live surgery . . . . .                                                                                     | i41 |
| O-104-O-109 | Session 29 – ART - Cryopreservation of gonads . . . . .                                                                 | i41 |
| O-110-O-115 | Session 30 – Endometrium . . . . .                                                                                      | i44 |
| O-116-O-121 | Session 31 – Endometriosis 1 . . . . .                                                                                  | i47 |
| O-122-O-127 | Session 32 – Ethics and law 2 . . . . .                                                                                 | i49 |
| O-128-O-129 | Session 33 – Male infertility tests in the era of ICSI . . . . .                                                        | i52 |
|             | Session 34 – Poster discussion 2 . . . . .                                                                              | i52 |
| O-130-O-133 | Session 35 – Paramedical - Nursing . . . . .                                                                            | i53 |
| O-134-O-135 | Session 36 – Female sexual differentiation (Clinical tutorial) . . . . .                                                | i55 |
| O-136       | Session 37 – Data form the ESHRE PGD Consortium . . . . .                                                               | i55 |
| O-137-O-138 | Session 38 – ESHRE Guidelines . . . . .                                                                                 | i55 |
| O-139-O-140 | Session 39 – Paramedical invited lectures - Putting theory into practice . . . . .                                      | i56 |
| O-141-O-145 | Session 40 – Female fertility - Clinical aspects 2 . . . . .                                                            | i56 |
| O-146-O-150 | Session 41 – Reproductive surgery . . . . .                                                                             | i58 |
| O-151-O-155 | Session 42 – Embryology Experimental . . . . .                                                                          | i60 |

|             |                                                      |     |
|-------------|------------------------------------------------------|-----|
| O-156-O-160 | Session 43 – Male fertility . . . . .                | i62 |
| O-161-O-165 | Session 44 – Psychology and counselling 1 . . . . .  | i64 |
| O-166-O-170 | Session 45 – ART - Stem cells . . . . .              | i66 |
| O-171-O-174 | Session 46 – Ovarian stimulation 3 . . . . .         | i69 |
| O-175-O-178 | Session 47 – ART - Risks and complications . . . . . | i70 |
| O-179-O-182 | Session 48 – ART - IUI . . . . .                     | i72 |
| O-183-O-186 | Session 49 – Cryopreservation . . . . .              | i74 |
| O-187-O-190 | Session 50 – Female fertility 1 . . . . .            | i75 |
| O-191-O-194 | Session 51 – Adolescence and contraception . . . . . | i77 |

**Wednesday, 4 July 2007**

|             |                                                                        |      |
|-------------|------------------------------------------------------------------------|------|
| O-195-O-196 | Session 52 – European and global IVF Monitoring. . . . .               | i79  |
| O-197-O-198 | Session 53 – Controversies in ovarian stimulation . . . . .            | i79  |
| O-199-O-200 | Session 54 – Early development . . . . .                               | i79  |
| O-201-O-207 | Session 55 – Ovarian stimulation 4 . . . . .                           | i80  |
| O-208-O-214 | Session 56 – Early pregnancy 2 . . . . .                               | i83  |
| O-215-O-221 | Session 57 – Psychology and counselling 2 . . . . .                    | i86  |
| O-222-O-228 | Session 58 – Endocrinology - Clinical 1 . . . . .                      | i88  |
| O-229-O-235 | Session 59 – Preimplantation genetic diagnosis . . . . .               | i91  |
| O-236-O-242 | Session 60 – Female fertility 2 . . . . .                              | i95  |
| O-243-O-244 | Session 61 – Advances in stem cell research . . . . .                  | i98  |
| O-245-O-246 | Session 62 – ASRM exchange lectures - Update in endometriosis. . . . . | i98  |
|             | Session 63 – Poster discussion 3 . . . . .                             | i98  |
| O-247       | Session 64 – Paramedical interactive debate. . . . .                   | i99  |
| O-248-O-252 | Session 65 – ART - Clinical procedures. . . . .                        | i99  |
| O-253-O-257 | Session 66 – ART - Clinical outcome 2. . . . .                         | i101 |
| O-258-O-262 | Session 67 – Implantation . . . . .                                    | i103 |
| O-263-O-267 | Session 68 – Endocrinology - Clinical 2 . . . . .                      | i105 |
| O-268-O-272 | Session 69 – Endometriosis 2 . . . . .                                 | i106 |
| O-273-O-277 | Session 70 – Laboratory procedures / IVM . . . . .                     | i108 |
| O-278       | Session 71 – Late breaking . . . . .                                   | i110 |

**Poster Presentations**

|             |                                                        |      |
|-------------|--------------------------------------------------------|------|
| P-279       | Adolescence, puberty . . . . .                         | i111 |
| P-280-P-285 | ART, basic research: ICSI, MESA, TESE. . . . .         | i111 |
| P-286-P-298 | ART, basic research: IVM . . . . .                     | i114 |
| P-299-P-301 | ART, clinical: follow-up children. . . . .             | i119 |
| P-302-P-308 | ART, clinical: GnRH agonist/antagonist. . . . .        | i120 |
| P-309-P-311 | ART, clinical: IUI . . . . .                           | i123 |
| P-312-P-327 | ART, clinical: outcome . . . . .                       | i124 |
| P-328-P-347 | ART, clinical: ovarian stimulation . . . . .           | i130 |
| P-348-P-353 | ART, clinical: pregnancy . . . . .                     | i138 |
| P-354-P-363 | ART, clinical: procedures . . . . .                    | i139 |
| P-364-P-370 | ART, clinical: prognostic factors. . . . .             | i143 |
| P-371-P-376 | ART, clinical: risks and complications . . . . .       | i146 |
| P-377-P-380 | ART, clinical: single embryo transfer . . . . .        | i148 |
| P-381       | ART, cloning . . . . .                                 | i150 |
| P-382-P-390 | ART, laboratory: cryopreservation of embryos . . . . . | i150 |
| P-391-P-399 | ART, laboratory: cryopreservation of gametes . . . . . | i153 |
| P-400-P-402 | ART, laboratory: cryopreservation of gonads . . . . .  | i157 |
| P-403-P-410 | ART, laboratory: embryo selection. . . . .             | i158 |
| P-411-P-414 | ART, laboratory: ICSI, MESA, TESE . . . . .            | i161 |
| P-415-P-433 | ART, laboratory: procedures . . . . .                  | i163 |
| P-434-P-442 | ART, stem cell research. . . . .                       | i170 |

|             |                                                 |      |
|-------------|-------------------------------------------------|------|
| P-443       | Contraception . . . . .                         | i173 |
| P-444-P-449 | Early pregnancy: basic research. . . . .        | i174 |
| P-450       | Early pregnancy: clinical aspects. . . . .      | i176 |
| P-451-P-453 | Embryology, experimental . . . . .              | i177 |
| P-454-P-458 | Embryology, human . . . . .                     | i178 |
| P-459-P-467 | Endocrinology: basic research . . . . .         | i180 |
| P-468-P-477 | Endocrinology: clinical aspects . . . . .       | i183 |
| P-478-P-486 | Endometriosis: basic research. . . . .          | i186 |
| P-487-P-488 | Endometriosis: clinical aspects. . . . .        | i190 |
| P-489-P-498 | Endometrium . . . . .                           | i191 |
| P-499-P-504 | Epidemiology, demography, terminology . . . . . | i195 |
| P-505-P-507 | Ethics and law. . . . .                         | i197 |
| P-508-P-517 | Female fertility: basic research. . . . .       | i198 |
| P-518-P-522 | Female fertility: clinical aspects. . . . .     | i202 |
| P-523       | Genetics: female . . . . .                      | i204 |
| P-524-P-528 | Genetics: male . . . . .                        | i204 |
| P-529-P-534 | Genetics: PGD . . . . .                         | i207 |
| P-535-P-537 | Genetics: PGS. . . . .                          | i209 |
| P-538-P-545 | Implantation . . . . .                          | i211 |
| P-546-P-554 | Male fertility: basic research . . . . .        | i214 |
| P-555-P-559 | Male fertility: clinical aspects . . . . .      | i218 |
| P-560-P-562 | Menopause . . . . .                             | i219 |
| P-563       | Paramedical: laboratory . . . . .               | i221 |
| P-564-P-565 | Paramedical: nursing . . . . .                  | i221 |
| P-566-P-575 | Psychology and counselling . . . . .            | i222 |
| P-576-P-580 | Reproductive surgery. . . . .                   | i226 |
